# Supplementary material
Source: PubMed Central journal article supplement (PMC5815002)
Supplement: jamacardiol-2-1385-s001.pdf [file jamacardiol-2-1385-s001.pdf]

## Supplementary Online Content

Giugliano RP, Keech A, Murphy SA, et al. Clinical efficacy and safety of evolocumab in high-risk patients receiving a statin: secondary analysis of patients with low LDL cholesterol levels and in those already receiving a maximal-potency statin in a randomized clinical trial. *JAMA Cardiol*. Published online November 8, 2017. doi:10.1001/jamacardio.2017.3944

**eTable 1.** Efficacy Outcomes With Evolocumab vs Placebo Stratified by Baseline LDL-C Level

**eTable 2.** Efficacy Outcomes With Evolocumab vs Placebo Stratified by Potency of Background Statin Treatment

This supplementary material has been provided by the authors to give readers additional information about their work.

**eTable 1.** Efficacy Outcomes With Evolocumab vs Placebo Stratified by Baseline LDL-C Level

| Outcome                             | Baseline LDL-C <70 mg/dL <sup>a</sup><br>(N=2034) |                     |                          | Baseline LDL-C ≥70 mg/dL<br>(N=25529) |                      |                          | P <sub>INT</sub> |
|-------------------------------------|---------------------------------------------------|---------------------|--------------------------|---------------------------------------|----------------------|--------------------------|------------------|
|                                     | Evolocumab<br>(N=1030)                            | Placebo<br>(N=1004) | Hazard Ratio<br>(95% CI) | Evolocumab<br>(N=12754)               | Placebo<br>(N=12775) | Hazard Ratio<br>(95% CI) |                  |
| Primary endpoint <sup>b</sup>       | 86 (8.3)                                          | 106 (10.6)          | 0.80 (0.60-1.07)         | 1258 (9.9)                            | 1457 (11.4)          | 0.86 (0.79-0.92)         | 0.65             |
| Key secondary endpoint <sup>c</sup> | 48 (4.7)                                          | 68 (6.8)            | 0.70 (0.48-1.01)         | 768 (6.0)                             | 945 (7.4)            | 0.81 (0.73-0.89)         | 0.44             |
| Other endpoints                     |                                                   |                     |                          |                                       |                      |                          |                  |
| Cardiovascular death                | 14 (1.4)                                          | 14 (1.4)            | 0.97 (0.46-2.04)         | 237 (1.9)                             | 226 (1.8)            | 1.05 (0.87-1.26)         | 0.88             |
| Myocardial infarction               | 25 (2.4)                                          | 43 (4.3)            | 0.58 (0.35-0.94)         | 443 (3.5)                             | 596 (4.7)            | 0.74 (0.65-0.84)         | 0.32             |
| Stroke                              | 17 (1.7)                                          | 20 (2.0)            | 0.85 (0.44-1.62)         | 190 (1.5)                             | 242 (1.9)            | 0.78 (0.65-0.95)         | 0.84             |
| Hospitalized for unstable angina    | 16 (1.6)                                          | 19 (1.9)            | 0.84 (0.43-1.64)         | 220 (1.7)                             | 220 (1.7)            | 1.00 (0.83-1.20)         | 0.63             |
| Coronary revascularization          | 51 (5.0)                                          | 65 (6.5)            | 0.78 (0.54-1.13)         | 708 (5.6)                             | 900 (7.0)            | 0.78 (0.71-0.86)         | 0.97             |

Baseline LDL-C data were not available for one patient randomized to placebo.

To convert LDL-C to millimoles per liter, multiply by 0.0259.

Data shown are n (%)

<sup>a</sup> These patients either had a final screening LDL-C of at least 70 mg/dL or a final screening non-HDL-C of at least 100 mg/dL.

<sup>b</sup> Cardiovascular death, myocardial infarction, stroke, hospitalization for unstable angina, or coronary revascularization

<sup>c</sup> Cardiovascular death, myocardial infarction, stroke

**eTable 2.** Efficacy Outcomes With Evolocumab vs Placebo Stratified by Potency of Background Statin Treatment

| Outcome                             | Maximal Potency Background Statin |                     |                          | Submaximal Potency Background Statin |                      |                          | P <sub>INT</sub> |
|-------------------------------------|-----------------------------------|---------------------|--------------------------|--------------------------------------|----------------------|--------------------------|------------------|
|                                     | Evolocumab<br>(N=3758)            | Placebo<br>(N=3775) | Hazard Ratio<br>(95% CI) | Evolocumab<br>(N=10026)              | Placebo<br>(N=10005) | Hazard Ratio<br>(95% CI) |                  |
| Primary endpoint <sup>a</sup>       | 421 (11.2)                        | 489 (13.0)          | 0.86 (0.75-0.98)         | 923 (12.4)                           | 1074 (13.9)          | 0.85 (0.78-0.93)         | 0.88             |
| Key secondary endpoint <sup>b</sup> | 246 (6.5)                         | 315 (8.3)           | 0.78 (0.66-0.92)         | 570 (7.9)                            | 698 (9.7)            | 0.81 (0.72-0.90)         | 0.71             |
| Other endpoints                     |                                   |                     |                          |                                      |                      |                          |                  |
| Cardiovascular death                | 74 (2.0)                          | 67 (1.8)            | 1.11 (0.80-1.54)         | 177 (2.6)                            | 173 (2.3)            | 1.02 (0.83-1.26)         | 0.67             |
| Myocardial infarction               | 141 (3.8)                         | 222 (5.9)           | 0.63 (0.51-0.78)         | 327 (4.3)                            | 417 (5.8)            | 0.78 (0.67-0.90)         | 0.11             |
| Stroke                              | 60 (1.6)                          | 60 (1.6)            | 1.00 (0.70-1.44)         | 147 (2.3)                            | 202 (2.8)            | 0.72 (0.58-0.89)         | 0.11             |
| Hospitalized for unstable angina    | 75 (2.0)                          | 90 (2.4)            | 0.84 (0.62-1.14)         | 161 (2.4)                            | 149 (1.9)            | 1.08 (0.86-1.35)         | 0.20             |
| Coronary revascularization          | 248 (6.6)                         | 316 (8.4)           | 0.78 (0.66-0.93)         | 511(6.5)                             | 649 (8.8)            | 0.78 (0.69-0.88)         | 0.95             |

Maximal potency statin = atorvastatin 80 mg or rosuvastatin 40 mg daily.

Data shown are n (%).

<sup>a</sup>Cardiovascular death, myocardial infarction, stroke, hospitalization for unstable angina, or coronary revascularization

<sup>b</sup>Cardiovascular death, myocardial infarction, stroke
